# Supplementary material
Source: MDPI journal article supplement (https://www.mdpi.com/2673-4125/3/3/30)
Supplement: s1 [file s1]

# Supporting Information

For the manuscript: “**Exploring the dynamics of holo-Shikimate Kinase through molecular mechanics**” by Pedro Ojeda-May. High Performance Computing Center North (HPC2N), Umeå University, S-90187 Umeå, Sweden. (pedro.ojeda-may@umu.se)

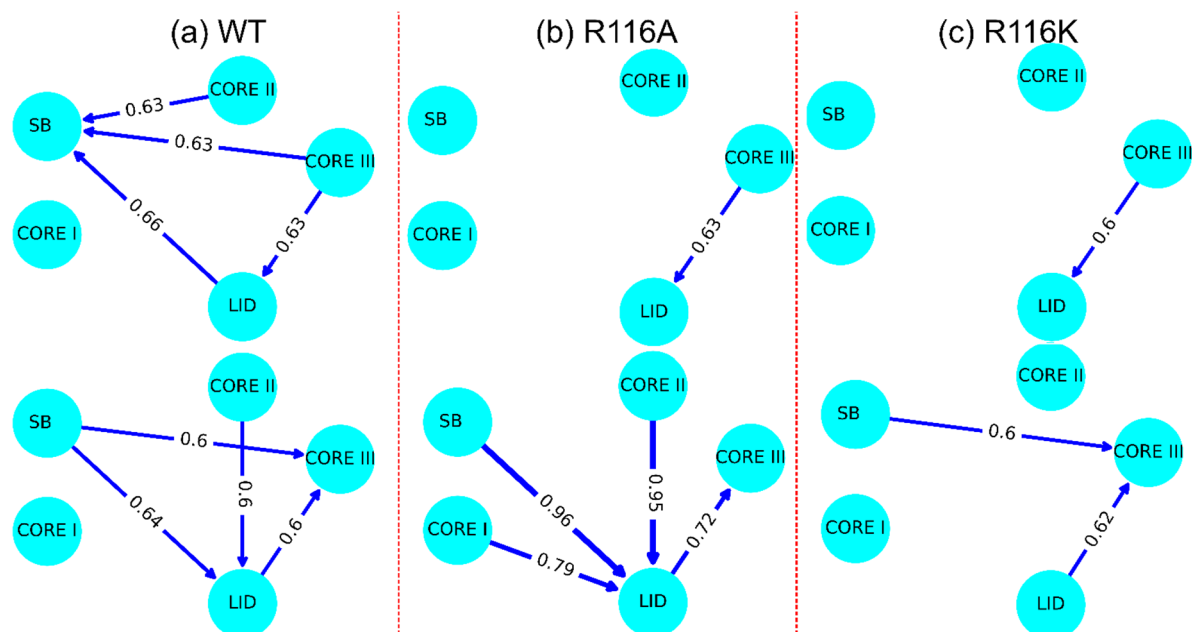

**Figure S1.** Directed graphs obtained from a 0.6 probability threshold with the Neural Relational Inference (NRI) method for the WT, R116A, and R116K variants in (a)-(c), respectively.
